# Supplementary material
Source: Frontiers journal article supplement (https://www.frontiersin.org/articles/253710)
Supplement: Table_1.PDF [file Table_1.PDF]

**Supplementary Materials**

**Voluntary Service Engagement Reporting Form**

Please write your experience of voluntary services during the last month (from . . . to . . .).

| Period (If you are not sure of the exact date, please provide the date as you remember) | Name of the charity | Amount of time (hours) |
|-----------------------------------------------------------------------------------------|---------------------|------------------------|
| Ex) May. 5. 2013.                                                                       | Save the Children   | 3                      |
|                                                                                         |                     |                        |
|                                                                                         |                     |                        |
|                                                                                         |                     |                        |
|                                                                                         |                     |                        |
|                                                                                         |                     |                        |
| (The rest has been omitted)                                                             |                     |                        |

## Class Plan

| Week # | Topics                               | Sample activities                                                            |
|--------|--------------------------------------|------------------------------------------------------------------------------|
| 1      | Donation and voluntary service       | Explore and praise related exemplars                                         |
| 2      |                                      | Draw a poster soliciting donation and voluntary service engagement           |
| 3      | Humility and sharing                 | Explore and praise related exemplars                                         |
| 4      |                                      | Make an award for exemplars with humility and sharing                        |
| 5      | Kindness and recognition of mistakes | Explore and praise related exemplars                                         |
| 6      |                                      | Perform a role-playing practicing kindness and recognition of mistakes       |
| 7      | Responsibility and voluntary help    | Explore and praise related exemplars                                         |
| 8      |                                      | Write news reports about concrete cases of responsibility and voluntary help |
